# Supplementary material for: Predictive Factors of Adequate Bowel Cleansing for Colonoscopy in the Elderly: A Retrospective Analysis of a Prospective Cohort
Source: MDPI journal article supplement (doi:10.3390/diagnostics12112867), 2022-11-19
Supplement: s1 [file s1]

**Supplementary Table S1.** Incidence of adverse events (AEs) in younger and elderly patients.

|                                  | <b>&lt;65 Years<br/>(N = 714)</b> | <b>≥65 Years<br/>(N = 575)</b> | <b><i>p</i></b> |
|----------------------------------|-----------------------------------|--------------------------------|-----------------|
| Patients with AEs, n (%)         | 144 (20.3%)                       | 92 (16.0)                      | 0.046           |
| Nausea, n (%)                    | 45 (6.4%)                         | 28 (4.9%)                      | 0.253           |
| Vomiting, n (%)                  | 27 (3.8%)                         | 21 (3.7%)                      | 0.591           |
| Abdominal pain, n (%)            | 18 (2.5%)                         | 8 (1.4%)                       | 0.146           |
| Thirst, n (%)                    | 8 (1.1%)                          | 1 (0.2%)                       | 0.041           |
| Patients with serious AEs, n (%) | 0                                 | 0                              | -               |
